# Supplementary material for: Preparation of V2O5 dot-decorated WO3 nanorod arrays for high performance multi-color electrochromic devices
Source: Royal Society of Chemistry journal article supplement (doi:10.1039/c8tc04247k), 2018-01-01
Supplement: c8tc04247k1.pdf [file c8tc04247k1.pdf]

## Supporting Information

### Preparation of V<sub>2</sub>O<sub>5</sub> dots decorated WO<sub>3</sub> nanorod arrays for high performance multi-color electrochromic devices

Kai Tang<sup>†</sup>, Yong Zhang<sup>†,‡,\*</sup>, Yingdi Shi<sup>†</sup>, Jiewu Cui<sup>†,‡</sup>, Xia Shu<sup>†,‡</sup>, Yan Wang<sup>†,‡</sup>, Jiaqin Liu<sup>a</sup>, Jiaheng Wang<sup>‡</sup>, Hark Hoe Tan<sup>b</sup> and Yucheng Wu<sup>†,‡,\*</sup>

<sup>†</sup>School of Materials Science and Engineering, Hefei University of Technology, Hefei 230009, China

<sup>‡</sup>Key Laboratory of Advanced Functional Materials and Devices of Anhui Province, Hefei 230009, China

---

\* To whom correspondence should be addressed.

<sup>†</sup>School of Materials Science and Engineering, Hefei University of Technology, Hefei 230009, China

<sup>‡</sup>Key Laboratory of Advanced Functional Materials and Devices of Anhui Province, Hefei 230009, China

---

<sup>a</sup> Institute of Industry & Equipment Technology, Hefei University of Technology, No.193 Tunxi Road, Hefei, Anhui 230009, China.

<sup>b</sup> Department of Electronic Materials Engineering, Research School of Physics and Engineering, The Australian National University, Canberra, ACT 2601, Australia

Email: zhangyong.mse@hfut.edu.cn, ycwu@hfut.edu.cn

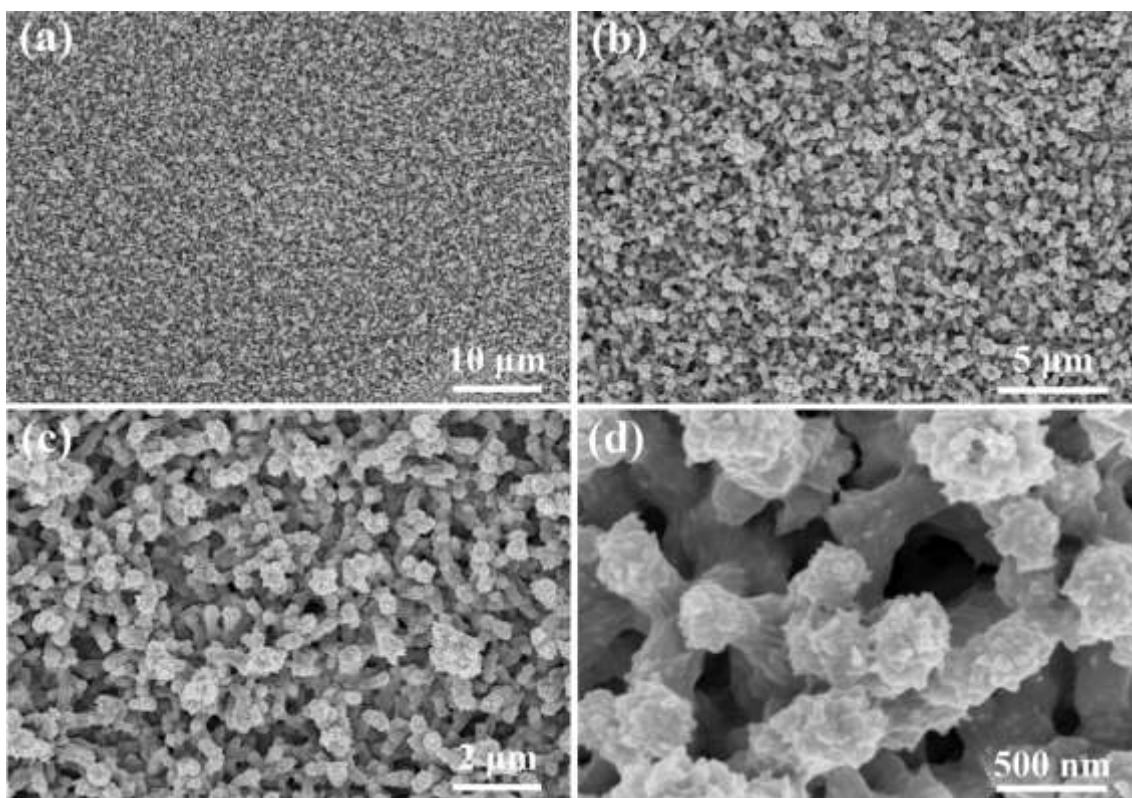

**Figure S1.** Different magnification SEM plan-view images of  $\text{WO}_3/2\text{cir-V}_2\text{O}_5$  hybrid film.

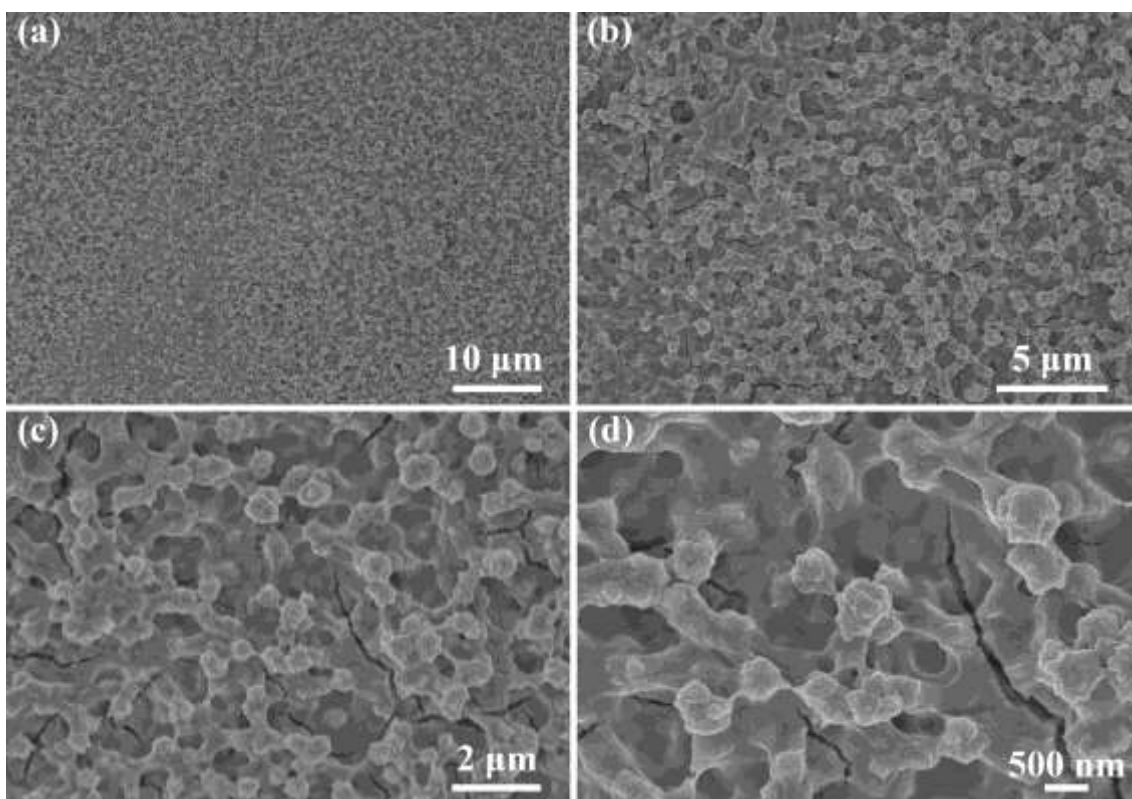

**Figure S2.** Different magnification SEM plan-view images of  $\text{WO}_3/3\text{cir-V}_2\text{O}_5$  hybrid film.

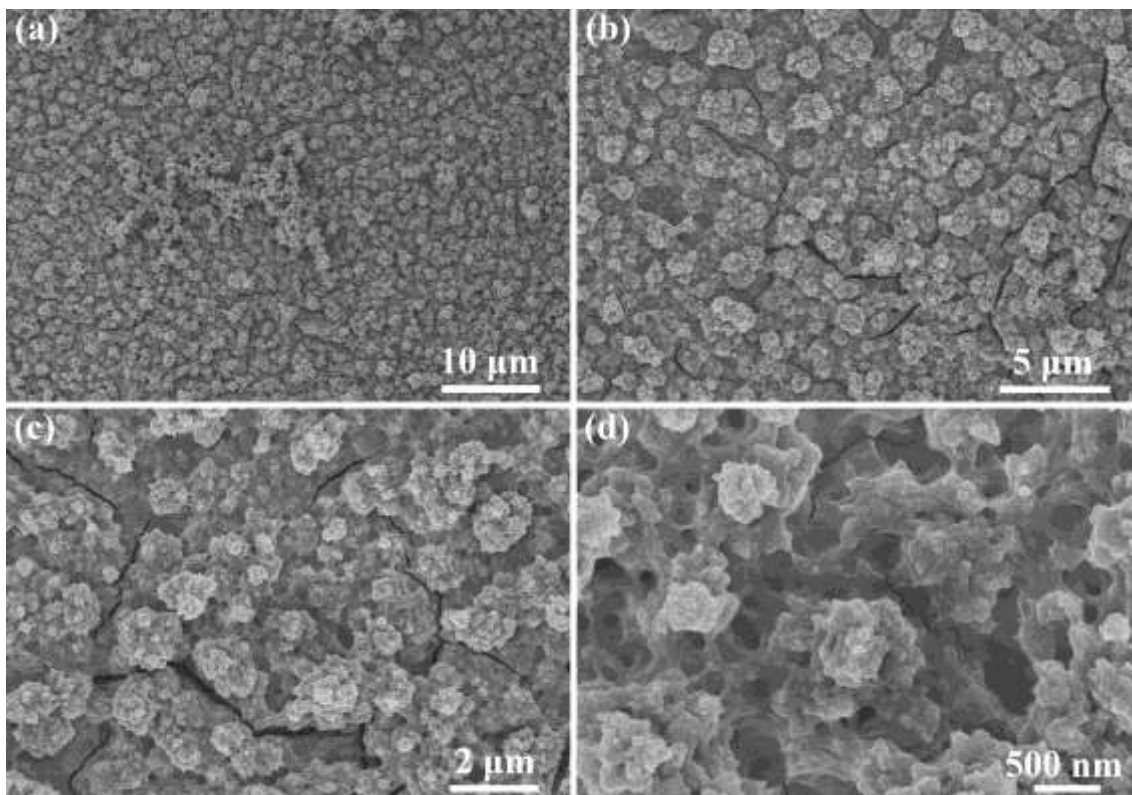

**Figure S3.** Different magnification SEM plan-view images of  $\text{WO}_3/4\text{cir-V}_2\text{O}_5$  hybrid film.

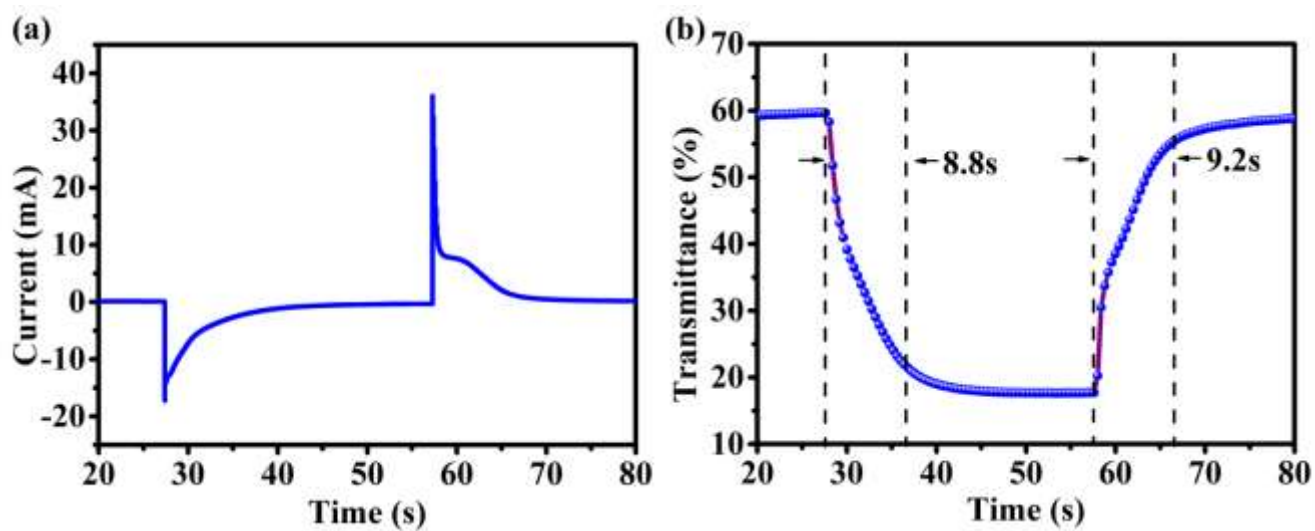

**Figure S4.** CA and in situ transmittance curves for  $\text{WO}_3/2\text{cir-V}_2\text{O}_5$  hybrid film, measured at 776 nm with voltage interval between -1.0 V (30 s) and 1.5 V (30 s).
